# Supplementary material for: Towards PErsonalised PRognosis for children with traumatic brain injury: the PEPR study protocol
Source: HighWire-hosted journal article supplement (doi:10.1136/bmjopen-2021-058975), 2022-06-01
Supplement: bmjopen-2021-058975supp001_data_supplement.pdf [file bmjopen-2021-058975supp001_data_supplement.pdf]

Towards Personalized Prognosis for Children with Traumatic Brain Injury: The PEPR Study Protocol

## Appendix 1

### 1. Emergency care

#### 1.1. Arrival

1. Date and time
2. Trauma Mechanism
3. Suspicion of abuse
4. Medication at the emergency department (including helicopter/ambulance)

#### 1.2. Advanced Paediatric Life Support Protocol

1. Awareness Level (Lowest GCS Score)
2. Loss of consciousness
3. Behaviour
4. Anterograde Post-Traumatic Amnesia

#### 1.3. Blood gas analysis and physiological parameters

1. Blood gas analysis
2. Physiological parameters

#### 1.4. Indications CT

1. Indications CT 2-5 years
2. CT indications from 6 years

#### 1.5. Abbreviated neurological examination

1. Pupils
2. Eye movements
3. Face
4. Motor skills
5. Reflexes

### 2. Intensive Care Unit (if applicable)

#### 2.1. Admission

1. Admitted to the intensive care unit
2. Date

#### 2.2. Measures

1. Mechanical ventilation
2. Trachea cannula
3. Device data
4. Glasgow Coma Scale score on admission
5. Pupil size on admission
6. Pupil reaction on admission
7. Intracranial Pressure
8. Medication

#### 2.3. Discharge

1. Date
2. Discharge destination
3. Discharge Condition

### 3. Nursing ward (if applicable)

#### 3.1. Admission

3. Admitted to the Nursing Ward
4. Date

Towards Personalized Prognosis for Children with Traumatic Brain Injury: The PEPR Study Protocol

### 3.2. Measures

1. Mechanical ventilation
2. Trachea cannula
3. Device data
4. Glasgow Coma Scale score on admission
5. Pupil size on admission
6. Pupil reaction on admission
7. Intracranial Pressure
8. Medication

### 3.3. Discharge

1. Date
2. Discharge destination
3. Discharge Condition

## 4. Radiology (if present)

### 4.1. CT scan

1. CT scan performed
2. Abnormalities on CT scan
3. Rotterdam CT score

### 4.2. MRI scan

1. MRI scan performed
2. Abnormalities on MRI scan

## 5. Neurosurgery

- 5.1. Neurosurgical Assessment
- 5.2. Neurosurgical Intervention (if assessed)
